# Supplementary material
Source: PubMed Central journal article supplement (PMC3490005)
Supplement: NIHMS389044-supplement-01.pdf [file NIHMS389044-supplement-01.pdf]

**Table 2. Microbial isolates in patients with keratitis and subsequent endophthalmitis**

|                               | <b>Primary Keratitis</b>                                                                                                                                                                                         | <b>Penetrating keratoplasty wound associated</b>                                                                                                                               | <b>Cataract wound associated</b> | <b>LASIK associated</b>             |
|-------------------------------|------------------------------------------------------------------------------------------------------------------------------------------------------------------------------------------------------------------|--------------------------------------------------------------------------------------------------------------------------------------------------------------------------------|----------------------------------|-------------------------------------|
| <b>Fungi</b>                  | <i>Fusarium</i> sp (n=13)<br><i>Candida</i> sp (n=3)<br><i>Acremonium</i> sp (n=1)<br><i>Aspergillus</i> sp (n=1)<br><i>Colletotrichum</i> sp (n=1)<br><i>Fonsecaea</i> sp (n=1)<br><i>Paecilomyces</i> sp (n=1) | <i>Fusarium</i> sp (n=1)<br><i>Acremonium</i> sp (n=1)<br><i>Candida</i> sp (n=1)                                                                                              | <i>Candida</i> sp (n=1)          | <i>Acremonium</i> sp (n=1)          |
| <b>Gram positive bacteria</b> | <i>S. pneumoniae</i> (n=2)<br><i>S. viridans</i> (n=1)                                                                                                                                                           | <i>S. pneumoniae</i> (n=4)<br><i>S. epidermidis</i> (n=1)<br><i>S. agalactiae</i> (n=1)<br><i>S. anginosus</i> (n=1)<br><i>S. pyogenes</i> (n=1)<br><i>S. salivarius</i> (n=1) |                                  | <i>Mycobacterium chelonae</i> (n=1) |
| <b>Gram negative bacteria</b> | <i>P. aeruginosa</i> (n=3)                                                                                                                                                                                       | <i>P. aeruginosa</i> (n=5)<br><i>S. marcescens</i> (n=1)                                                                                                                       | <i>S. marcescens</i> (n=1)       |                                     |
