# Supplementary material
Source: PubMed Central journal article supplement (PMC3490005)
Supplement: NIHMS389044-supplement-02.pdf [file NIHMS389044-supplement-02.pdf]

**Table 4. Demographics, Clinical Characteristics, and Microbial Isolates in Subset of Patients Undergoing PPV**

| Age (years) | Gender | Year | Organism                  | Primary vs. Surgical-Wound Associated Keratitis | VA prior to PPV | Days from presentation to PPV | PKP | VA at last examination | Globe Salvage |
|-------------|--------|------|---------------------------|-------------------------------------------------|-----------------|-------------------------------|-----|------------------------|---------------|
| 49          | F      | 2002 | <i>Candida sp.</i>        | Primary Keratitis                               | HM              | 71                            | Yes | 4/200                  | Yes           |
| 51          | M      | 2003 | <i>Colletotrichum sp.</i> | Primary Keratitis                               | 20/400          | 8                             | Yes | HM                     | Yes           |
| 57          | M      | 1999 | <i>Fusarium sp.</i>       | Primary Keratitis                               | 20/400          | 50                            | Yes | NLP                    | Yes           |
| 51          | M      | 2000 | <i>Fusarium sp.</i>       | Primary Keratitis                               | LP              | 1                             | Yes | 20/400                 | Yes           |
| 53          | F      | 2001 | <i>Fusarium sp.</i>       | Primary Keratitis                               | HM              | 14                            | Yes | NLP                    | No            |
| 36          | M      | 2000 | <i>Fusarium sp.</i>       | Primary Keratitis                               | HM              | 43                            | Yes | HM                     | Yes           |
| 96          | M      | 1999 | <i>S. pneumoniae</i>      | Primary Keratitis                               | HM              | 2                             | No  | HM                     | Yes           |
| 90          | F      | 2006 | <i>Acremonium sp.</i>     | Surgical-Wound Associated                       | LP              | 32                            | Yes | NLP                    | No            |
| 78          | F      | 1999 | <i>Candida sp.</i>        | Surgical-Wound Associated                       | HM              | 1                             | Yes | 20/200                 | Yes           |
| 78          | F      | 2001 | <i>Candida sp.</i>        | Surgical-Wound Associated                       | 3/200           | 0                             | Yes | 20/800                 | Yes           |
| 79          | F      | 1996 | <i>P. aeruginosa</i>      | Surgical-Wound Associated                       | HM              | 10                            | No  | NLP                    | Yes           |
| 83          | F      | 1995 | <i>P. aeruginosa</i>      | Surgical-Wound Associated                       | LP              | 0                             | No  | NLP                    | No            |
| 81          | F      | 2003 | <i>P. aeruginosa</i>      | Surgical-Wound Associated                       | HM              | 1                             | No  | LP                     | Yes           |
| 81          | M      | 2000 | <i>P. aeruginosa</i>      | Surgical-Wound Associated                       | HM              | 0                             | No  | LP                     | Yes           |
| 77          | M      | 2007 | <i>S. epidermidis</i>     | Surgical-Wound Associated                       | HM              | 195                           | Yes | 20/200                 | Yes           |
| 70          | M      | 1997 | <i>S. pneumoniae</i>      | Surgical-Wound Associated                       | 20/200          | 2                             | No  | LP                     | Yes           |
| 73          | F      | 2007 | <i>S. salivarius</i>      | Surgical-Wound Associated                       | LP              | 2                             | Yes | 20/400                 | Yes           |

Notes: VA= Visual Acuity, PPV= Pars Plana Vitrectomy, PKP = Penetrating keratoplasty, HM=Hand motions, LP = Light Perception, NLP = No Light Perception  
 Globe salvage = avoidance of enucleation or evisceration, M=Male, F=Female
